# Supplementary material
Source: publisher figshare collection journal article supplement (https://acs.figshare.com/ndownloader/files/8596975)
Supplement: Supplementary file 1 [file 8596975]

## Supporting Information

### Photoelectrochemical Properties of GaN Photoanodes with Cobalt Phosphate Catalyst for Solar Water Splitting in Neutral Electrolyte

Jumpei Kamimura,<sup>\*,†</sup> Peter Bogdanoff,<sup>‡</sup> Fatwa F. Abdi,<sup>‡</sup> Jonas Lähnemann,<sup>†</sup>

Roel van de Krol,<sup>‡</sup> Henning Riechert,<sup>†</sup> and Lutz Geelhaar<sup>†</sup>

<sup>†</sup>*Paul-Drude-Institut für Festkörperelektronik, Hausvogteiplatz 5-7, 10117 Berlin, Germany*

<sup>‡</sup>*Helmholtz-Zentrum Berlin für Materialien und Energie GmbH, Institute for Solar Fuels,*

*Hahn-Meitner-Platz 1, 14109 Berlin, Germany*

E-mail: kamimura@pdi-berlin.de

#### Detailed analysis by scanning electron microscopy (SEM) and energy dispersive X-ray (EDX) spectroscopy

We studied in an analytical scanning electron microscope the GaN template on which the largest amount (corresponding to a passed charge of  $162 \text{ mC/cm}^2$ ) of cobalt phosphate (Co-Pi) had been deposited. We focused on this sample, as still the amount of Co-Pi is at the detection limit of the employed techniques. Figures S1(a) and (b) present top-view micrographs acquired with the conventional and in-lens detectors of the SEM, respectively. In general, while conventional detectors predominantly image morphological features, in-lens detectors have a higher sensitivity for material contrasts. Particularly, surface coatings can strongly modify the escape of low energy secondary electrons that contribute to the in-lens detector signal, whereby even monolayer graphene can be imaged.<sup>1-3</sup> Indeed, the conventional SEM image [Figure S1(a)] reveals only the surface morphology, i.e. the terraces of the original GaN template separated by macrostep edges. In contrast, the in-lens detector image [Figure S1(b)] exhibits dark regions on the terraces and bright areas at the macrostep edges, which already indicate a variation in the coverage of the Co-Pi film. EDX spectra from the two types of regions are presented in Figure S1(c). The spectrum from

a terrace demonstrates the presence of cobalt and phosphorus in the sample, consistent with previous reports on Co-Pi catalysts.<sup>4,5</sup> On the other hand, the EDX spectrum from a step edge does not contain any feature characteristic for Co-Pi. Therefore, we conclude that the bright regions near the step edges in Figure S1(b) correspond to a lower film thickness of the deposited Co-Pi.

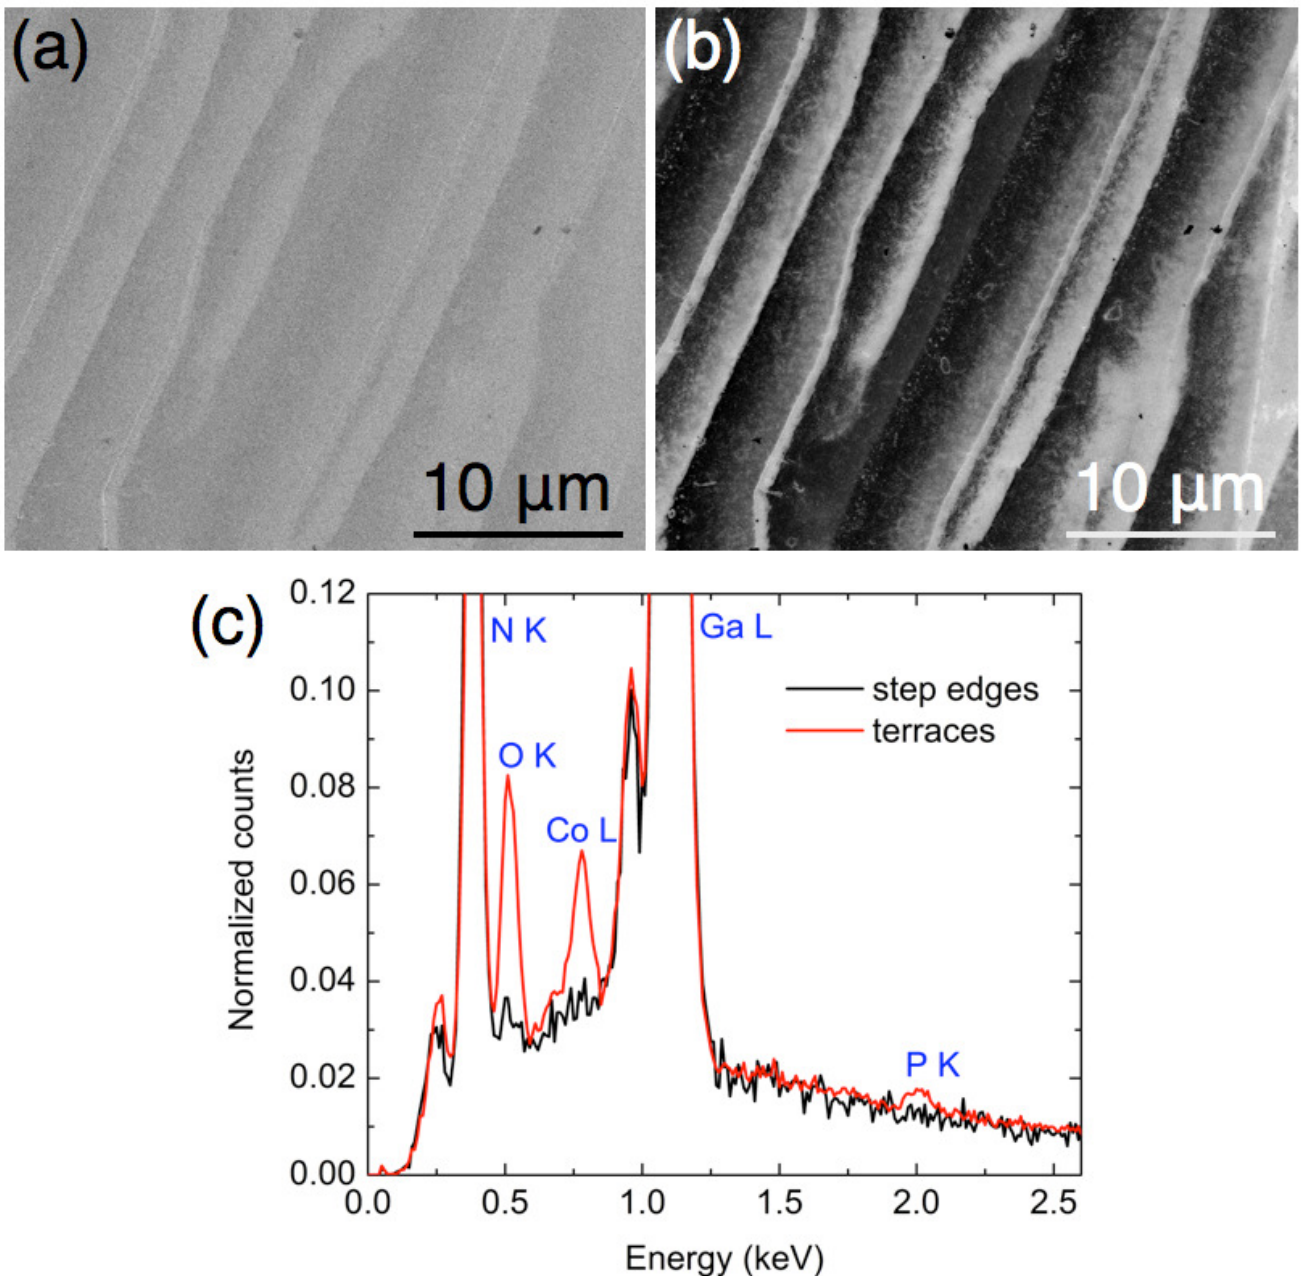

**Figure S1.** Top-view SEM images of the same area of Co-Pi deposited on a GaN template (passed charge 162 mC/cm<sup>2</sup>) obtained with (a) the conventional detector and (b) the in-lens detector. (c) EDX spectra taken on a terrace [dark area in (b)] and at a step edge [bright area in (b)] with the microscope operated at an acceleration voltage of 4.5 kV.

## Current-voltage curves for GaN layers in different electrolytes

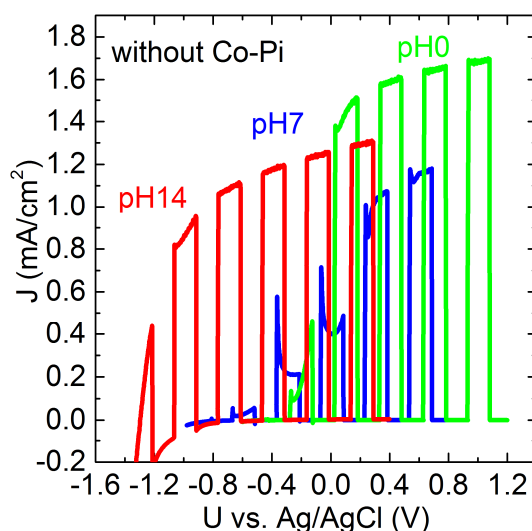

**Figure S2.** Current-voltage curves for GaN layers in three different electrolytes, H<sub>2</sub>SO<sub>4</sub> (pH0), KPi (pH7), and NaOH (pH14) under chopped Xe lamp illumination.

## References

1. Kochat, V.; Pal, A. N.; Sneha, E. S.; Sampathkumar, A.; Gairola, A.; Shivashankar, S. A.; Raghavan, S.; Ghosh, A. High Contrast Imaging and Thickness Determination of Graphene with in-Column Secondary Electron Microscopy. *J. Appl. Phys.* **2011**, *110*, 014315.
2. Wofford, J. M.; Oliveira, M. H.; Schumann, T.; Jenichen, B.; Ramsteiner, M.; Jahn, U.; Fölsch, S.; Lopes, J. M. J.; Riechert, H. Molecular Beam Epitaxy of Graphene on Ultra-Smooth Nickel: Growth Mode and Substrate Interactions. *New J. Phys.* **2014**, *16*, 093055.
3. Lähnemann, J.; Flissikowski, T.; Wölz, M.; Geelhaar, L.; Grahn, H. T.; Brandt, O.; Jahn, U. Quenching of the Luminescence Intensity of GaN Nanowires under Electron Beam Exposure: Impact of C Adsorption on the Exciton Lifetime. *Nanotechnology* **2016**, *27*, 455706.
4. Kanan, M. W.; Nocera, D. G. In Situ Formation of an Oxygen-Evolving Catalyst in Neutral Water Containing Phosphate and Co<sup>2+</sup>. *Science* **2008**, *321*, 1072–1075.
5. Khnayzer, R. S.; Mara, M. W.; Huang, J.; Shelby, M. L.; Chen, L. X.; Castellano, F. N. Structure and Activity of Photochemically Deposited “CoPi” Oxygen Evolving Catalyst on Titania. *ACS Catal.* **2012**, *2*, 2150–2160.
